# Supplementary material for: Floral Volatile Organic Compounds Change the Composition and Function of the Endophytic Fungal Community in the Flowers of Osmanthus fragrans
Source: Int J Mol Sci. 2024 Jan 10;25(2):857. doi: 10.3390/ijms25020857 (PMC10815108; doi:10.3390/ijms25020857)
Supplement: Supplementary file 1 [file ijms-25-00857-s001.zip › Supplementary Tables.xls]

## Sheet: Sheet1
Table S1 Floral volatile organic compounds (VOCs) identified in four flowering stages of Osmanthus fragrans ‘Rixiang Gui’, detected by headspace GC-MS.
Components	Relative content (μg/g)
	RXX stage	RXC stage	RXS stage	RXM stage
Hexanal	0.011±0.001a	0.006±0.001a	0.006±0.000a	0.021±0.005b
(E)-2-Hexenal	0.083±0.010a	0.064±0.009a	0.059±0.006a	0.096±0.021a
cis-3-Hexenyl Acetate	0.033±0.010ab	0.067±0.022b	0.006±0.001a	0.014±0.003ab
Limonene	0.010±0.002b	0.010±0.002b	0.012±0.001b	0.002±0.002a
cis-β-Ocimene	0.002±0.001a	0.002±0.001ab	NA	NA
trans-β-Ocimene	0.018±0.002b	0.017±0.001b	0.010±0.001a	0.007±0.001a
cis-Linalool oxide (furan)	1.214±0.087a	1.585±0.100a	2.761±0.235b	2.774±0.047b
trans-Linalool oxide (furan)	1.935±0.133a	2.453±0.173a	3.181±0.247b	3.629±0.072b
Linalool	3.193±0.114b	3.156±0.292b	0.820±0.259a	0.232±0.053a
2,2,6-Trimethyl-6-ethenyldihydro-2H-pyran-3(4H)-one	0.004±0.002a	NA	NA	0.191±0.062b
allo-Ocimene	0.004±0.000b	0.004±0.000b	NA	NA
trans-allo-Ocimene	NA	NA	NA	0.002±0.000b
NA1	0.017±0.003b	0.018±0.003b	0.021±0.003b	0.006±0.001a
trans-Linalool oxide (pyran)	0.381±0.017a	0.442±0.026ab	0.533±0.053b	0.867±0.054c
cis-Linalool oxide (pyran)	1.053±0.039a	1.230±0.088a	1.197±0.113a	1.672±0.071b
cis-3-Hexenyl butyrate	0.016±0.009a	0.008±0.004a	NA	NA
2,6-Dimethyl-3,7-octadiene-2,6-diol	NA	NA	0.001±0.001a	0.003±0.001b
Methyl salicylate	NA	0.004±0.001a	0.029±0.004b	NA
Decanal	NA	NA	NA	0.029±0.006b
β-Cyclocitral	0.001±0.001a	0.001±0.000a	NA	0.001±0.001a
cis-3-Hexenyl isovalerate	0.004±0.000b	0.005±0.001bc	0.001±0.000a	0.006±0.001c
Geraniol	0.010±0.001b	0.009±0.001b	0.004±0.000a	0.007±0.001b
NA2	0.006±0.001b	0.004±0.000ab	0.009±0.000c	0.003±0.000a
Citral	0.003±0.000a	0.003±0.000a	0.003±0.000a	0.009±0.001b
2,6-Dimethyl-1,7-octadien-3,6-diol	0.008±0.000b	0.010±0.001c	0.002±0.000a	NA
Megastigma-4,6(E),8(E)-triene	0.002±0.000a	0.002±0.000b	0.003±0.000b	NA
Megastigma-4,6(Z),8(E)-triene	0.009±0.000b	0.008±0.001b	0.012±0.000c	0.005±0.001a
α-Ionol	0.011±0.001b	0.009±0.000ab	0.011±0.004b	0.003±0.001a
β-Ionol	0.028±0.001c	0.023±0.001b	0.039±0.001d	0.008±0.001a
α-Ionone	0.897±0.036b	0.861±0.041b	0.888±0.039b	0.143±0.013a
Dihydro-β-ionone	0.606±0.034b	0.710±0.040b	1.053±0.054c	0.219±0.036a
Dihydro-β-ionol	0.012±0.001b	0.009±0.001b	0.033±0.002c	0.004±0.001a
Geranyl acetone	NA	NA	0.011±0.002b	0.001±0.001a
γ-Decalactone	0.119±0.021a	0.043±0.011a	0.541±0.058c	0.244±0.018b
β-Ionone	2.057±0.049b	2.102±0.130b	2.815±0.077c	0.968±0.097a
Results represent the Means ± standard error of 4 biological replicates (except RXM which was 3 biological replicates)
NA represents not applicable

## Sheet: Sheet2
Table S2 Adonis analysis based on Unweighted_unifrac distances shows effects of flowering stage on the endophytic fungi community compositions.
Factor	% Explained	F. Model	R2	value of p
Stage	33.45	1.8	0.33	0.005**
Residuals	66.55		0.67
Total	100		1

## Sheet: Sheet3
Table S3 Comparison of the class abundance of endophytic fungal communities between four flowering stages by using Kruskal-Wallis test.
Class	RXX stage	RXC stage	RXS stage	RXM stage	Sig. (Kruskal-Wallis)
Dothideomycetes	0.0182±0.0083	0.0157±0.0052	0.0054±0.0014a	0.1382±0.0890b	0.041*
Eurotiomycetes	0.0052±0.0016	0.0196±0.0090	0.0208±0.0092	0.0426±0.0219	0.126
Sordariomycetes	0.0022±0.0006	0.0024±0.0009	0.0002±0.0001	0.0021±0.0011	0.054
Exobasidiomycetes	0.0001±0.0001	0.0001±0.0001	0.0000±0.0001a	0.0015±0.0007b	0.042*
Agaricomycetes	0.0003±0.0002	0.0000±0.0000	0.0000±0.0000	0.0001±0.0000	0.786
Leotiomycetes	0.0001±0.0001	0.0000±0.0000	0.0000±0.0000	0.0002±0.0002	0.331
Tremellomycetes	0.0001±0.0001	0.0000±0.0000	0.0000±0.0000	0.0001±0.0001	0.515
Saccharomycetes	0.0000±0.0000	0.0000±0.0000	0.0000±0.0000	0.0000±0.0000	0.432
Lecanoromycetes	0.0000±0.0000	0.0000±0.0000	0.0000±0.0000	0.0000±0.0000	0.261
Ustilaginomycetes	0.0000±0.0000	0.0000±0.0000	0.0000±0.0000	0.0000±0.0000	0.432
Pucciniomycetes	0.0000±0.0000	0.0000±0.0000	0.0000±0.0000	0.0000±0.0000	0.261
Results represent the Means ± standard error of 4 biological replicates (except RXM which was 3 biological replicates)

## Sheet: Sheet4
Table S4 Comparison of the order abundance of endophytic fungal communities between four flowering stages by using Kruskal-Wallis test.
Order	RXX stage	RXC stage	RXS stage	0.0000±0.0000	Sig. (Kruskal-Wallis)
Pleosporales	0.0096±0.0050	0.0063±0.0019	0.0008±0.0003a	0.1022±0.0924b	0.025*
Chaetothyriales	0.0048±0.0014	0.0195±0.0090	0.0208±0.0092	0.0425±0.0219	0.126
Capnodiales	0.0064±0.0027	0.0083±0.0033	0.0039±0.0011	0.0284±0.0104	0.141
Dothideomycetes_ord_Incertae_sedis	0.0002±0.0001	0.0002±0.0000	0.0004±0.0004	0.0053±0.0046	0.12
Dothideales	0.0018±0.0010	0.0006±0.0003	0.0001±0.0001	0.0020±0.0008	0.073
Microstromatales	0.0001±0.0001	0.0001±0.0001	0.0000±0.0001a	0.0015±0.0007b	0.042*
Trichosphaeriales	0.0006±0.0005	0.0009±0.0004a	0.0000±0.0000b	0.0004±0.0001	0.036*
Hypocreales	0.0011±0.0005	0.0005±0.0002	0.0001±0.0001	0.0009±0.0006	0.096
Diaporthales	0.0004±0.0002	0.0007±0.0003	0.0000±0.0000	0.0007±0.0005	0.114
Eurotiales	0.0003±0.0003	0.0001±0.0000	0.0000±0.0000	0.0001±0.0000	0.120
Russulales	0.0002±0.0002	0.0000±0.0000	0.0000±0.0000	0.0001±0.0000	0.862
Myriangiales	0.0000±0.0000	0.0000±0.0000	0.0000±0.0000	0.0002±0.0002	0.261
Botryosphaeriales	0.0002±0.0002	0.0002±0.0002	0.0001±0.0001	0.0001±0.0000	0.489
Helotiales	0.0000±0.0000	0.0000±0.0000	0.0000±0.0000	0.0002±0.0002	0.259
Togniniales	0.0000±0.0000	0.0001±0.0001	0.0000±0.0000	0.0000±0.0000	0.822
Tremellales	0.0001±0.0001	0.0000±0.0000	0.0000±0.0000	0.0001±0.0001	0.515
Xylariales	0.0001±0.0001	0.0000±0.0000	0.0000±0.0000	0.0000±0.0000	0.58
Erysiphales	0.0001±0.0001	0.0000±0.0000	0.0000±0.0000	0.0000±0.0000	0.48
Glomerellales	0.0000±0.0000	0.0001±0.0000	0.0000±0.0000	0.0000±0.0000	0.117
Caliciales	0.0000±0.0000	0.0000±0.0000	0.0000±0.0000	0.0000±0.0000	0.261
Saccharomycetales	0.0000±0.0000	0.0000±0.0000	0.0000±0.0000	0.0000±0.0000	0.432
Septobasidiales	0.0000±0.0000	0.0000±0.0000	0.0000±0.0000	0.0000±0.0000	0.261
Ustilaginales	0.0000±0.0000	0.0000±0.0000	0.0000±0.0000	0.0000±0.0000	0.432
Filobasidiales	0.0000±0.0000	0.0000±0.0000	0.0000±0.0000	0.0000±0.0000	0.432
Acrospermales	0.0000±0.0000	0.0000±0.0000	0.0000±0.0000	0.0000±0.0000	0.432
Agaricales	0.0000±0.0000	0.0000±0.0000	0.0000±0.0000	0.0000±0.0000	0.432
Onygenales	0.0000±0.0000	0.0000±0.0000	0.0000±0.0000	0.0000±0.0000	0.244
Polyporales	0.0000±0.0000	0.0000±0.0000	0.0000±0.0000	0.0000±0.0000	0.117
Results represent the Means ± standard error of 4 biological replicates (except RXM which was 3 biological replicates)

## Sheet: Sheet5
Table S5 Comparison of the genus abundance of endophytic fungal communities between four flowering stages by using Kruskal-Wallis test.
Genus	RXX stage	RXC stage	RXS stage	RXM stage	Sig. (Kruskal-Wallis)
Camptophora	0.0014±0.0006	0.0068±0.0051	0.0028±0.0016	0.0241±0.0212	0.387
Cladosporium	0.0064±0.0026	0.0081±0.0033	0.0019±0.0005	0.0273±0.0106	0.081
Paraconiothyrium	0.0002±0.0001	0.0000±0.0000	0.0003±0.0002	0.0059±0.0054	0.061
Neocladophialophora	0.0002±0.0001	0.0002±0.0000	0.0000±0.0000a	0.0052±0.0046b	0.008**
Phaeosphaeria	0.0022±0.0019	0.0004±0.0001	0.0000±0.0000a	0.0014±0.0008b	0.027*
Setophoma	0.0002±0.0002	0.0001±0.0000	0.0000±0.0000a	0.0026±0.0024b	0.013*
Aureobasidium	0.0018±0.0010	0.0005±0.0003	0.0001±0.0000	0.0014±0.0004	0.060
Alternaria	0.0004±0.0002	0.0001±0.0001	0.0000±0.0000a	0.0021±0.0006b	0.009**
Strelitziana	0.0002±0.0001	0.0014±0.0007	0.0005±0.0002	0.0007±0.0004	0.268
Jaminaea	0.0001±0.0001	0.0001±0.0001	0.0000±0.0001a	0.0015±0.0007b	0.042*
Nigrospora	0.0006±0.0005	0.0009±0.0004b	0.0000±0.0000a	0.0004±0.0001	0.037*
Sclerostagonospora	0.0002±0.0002	0.0001±0.0001	0.0000±0.0000a	0.0008±0.0006b	0.026*
Dothidea	0.0000±0.0000	0.0000±0.0000	0.0000±0.0000	0.0006±0.0006	0.144
Neocochlearomyces	0.0000±0.0000	0.0000±0.0000	0.0004±0.0004	0.0000±0.0000	0.391
Clonostachys	0.0004±0.0004	0.0001±0.0000	0.0000±0.0000	0.0001±0.0000	0.087
Diaporthe	0.0003±0.0001	0.0005±0.0003	0.0000±0.0000	0.0003±0.0001	0.164
Fuscostagonospora	0.0000±0.0000	0.0000±0.0000	0.0000±0.0000	0.0005±0.0004	0.129
Penicillium	0.0003±0.0003	0.0001±0.0000	0.0000±0.0000	0.0001±0.0000	0.120
Sporidesmium	0.0000±0.0000	0.0000±0.0000	0.0000±0.0000	0.0003±0.0004	0.507
Pseudopithomyces	0.0002±0.0003	0.0001±0.0001	0.0000±0.0000	0.0001±0.0001	0.408
Keissleriella	0.0000±0.0001	0.0000±0.0000	0.0000±0.0000	0.0003±0.0003	0.130
Periconia	0.0001±0.0001	0.0004±0.0001b	0.0000±0.0000a	0.0000±0.0000	0.032*
Trichomerium	0.0000±0.0001	0.0002±0.0001	0.0003±0.0002	0.0003±0.0002	0.460
Fusarium	0.0002±0.0002	0.0001±0.0001	0.0000±0.0000	0.0002±0.0001	0.161
Neofabraea	0.0000±0.0000	0.0000±0.0000	0.0000±0.0000	0.0002±0.0002	0.259
Toxicocladosporium	0.0000±0.0000a	0.0000±0.0000a	0.0000±0.0000a	0.0003±0.0002b	0.003**
Botryosphaeria	0.0002±0.0002	0.0002±0.0001	0.0001±0.0001	0.0001±0.0000	0.544
Neosetophoma	0.0002±0.0001	0.0000±0.0000	0.0000±0.0000	0.0001±0.0001	0.163
Phaeoacremonium	0.0000±0.0000	0.0001±0.0001	0.0000±0.0000	0.0000±0.0000	0.822
Corynespora	0.0001±0.0001	0.0001±0.0001	0.0000±0.0000	0.0000±0.0000	0.365
Calophoma	0.0000±0.0000	0.0000±0.0000	0.0000±0.0000	0.0001±0.0001	0.261
Hannaella	0.0001±0.0001	0.0000±0.0000	0.0000±0.0000	0.0001±0.0001	0.303
Dothiorella	0.0000±0.0000	0.0001±0.0001	0.0000±0.0000	0.0000±0.0000	0.432
Ustilaginoidea	0.0001±0.0001	0.0001±0.0000	0.0000±0.0000	0.0001±0.0001	0.157
Colletotrichum	0.0000±0.0000	0.0001±0.0000	0.0000±0.0000	0.0000±0.0000	0.117
Results represent the Means ± standard error of 4 biological replicates (except RXM which was 3 biological replicates)

## Sheet: Sheet6
Table S6 The classification of endophytic fungi predicted by FunGuild.
OTU ID	RXX	RXC	RXS	RXM	Taxonomy	Taxon	Taxon Level	Trophic Mode	Guild	Growth Morphology	Trait	Confidence Ranking	Notes	Citation/Source
ASV6	266.50±101.71	355.50±145.78	55.75±18.31	620.66±218.15	k__Fungi; p__Ascomycota; c__Dothideomycetes; o__Capnodiales; f__Cladosporiaceae; g__Cladosporium; s__Cladosporium_cladosporioides	Cladosporium	13	Pathotroph-Symbiotroph	Endophyte-Plant Pathogen	Microfungus	NULL	Possible	Host - Fabaceae	http://www.apsnet.org/publications/commonnames/Pages/default.aspx
ASV8	84.25±37.15	105.75±39.87	56.50±20.73	874.00±351.71	k__Fungi; p__Ascomycota; c__Dothideomycetes; o__Capnodiales; f__Cladosporiaceae; g__Cladosporium	Cladosporium	13	Pathotroph-Symbiotroph	Endophyte-Plant Pathogen	Microfungus	NULL	Possible	Host - Fabaceae	http://www.apsnet.org/publications/commonnames/Pages/default.aspx
ASV15	0.00±0.00	0.00±0.00	4.00±3.67	306.00±306.00	k__Fungi; p__Ascomycota; c__Dothideomycetes; o__Pleosporales; f__Didymosphaeriaceae; g__Paraconiothyrium	Paraconiothyrium	13	Saprotroph	Undefined Saprotroph	NULL	NULL	Probable	NULL	Tedersoo L, et al. 2014. Science 346:1256688
ASV25	12.75±4.76	82.75±39.37	27.75±10.87	42.66±19.67	k__Fungi; p__Ascomycota; c__Eurotiomycetes; o__Chaetothyriales; f__Chaetothyriales_fam_Incertae_sedis; g__Strelitziana; s__Strelitziana_eucalypti	Strelitziana	13	Pathotroph	Plant Pathogen	NULL	NULL	Probable	NULL	Tedersoo L, et al. 2014. Science 346:1256688
ASV26	78.50±69.16	20.75±6.32	0.75±0.75	71.00±44.18	k__Fungi; p__Ascomycota; c__Dothideomycetes; o__Pleosporales; f__Phaeosphaeriaceae; g__Phaeosphaeria	Phaeosphaeria	13	Saprotroph	Undefined Saprotroph	NULL	NULL	Probable	NULL	Tedersoo L, et al. 2014. Science 346:1256688
ASV30	27.00±12.82	7.75±3.52	0.00±0.00	124.33±37.1	k__Fungi; p__Ascomycota; c__Dothideomycetes; o__Pleosporales; f__Pleosporaceae; g__Alternaria; s__Alternaria_alternata	Alternaria	13	Pathotroph-Saprotroph-Symbiotroph	Animal Pathogen-Endophyte-Plant Pathogen-Wood Saprotroph	Microfungus	Soft Rot	Probable	NULL	Duncan CG, Eslyn WE. 1966. Mycologia 58:642-664; Seehann G, et al. 1975. List of Fungi in Soft-Rot Tissue Tests. Institute fur Holzbiologie und Holzschutz, Bundesforschungsanstalt fur Forst - und Holzwirtshaft, Hamburg - Lohbrugge, Germany; Tedersoo L, et al. 2014. Science 346:125688
ASV39	22.75±22.75	21.50±13.34	0.00±0.00	65.66±34.52	k__Fungi; p__Ascomycota; c__Dothideomycetes; o__Capnodiales; f__Cladosporiaceae; g__Cladosporium; s__Cladosporium_cladosporioides	Cladosporium	13	Pathotroph-Symbiotroph	Endophyte-Plant Pathogen	Microfungus	NULL	Possible	Host - Fabaceae	http://www.apsnet.org/publications/commonnames/Pages/default.aspx
ASV42	60.25±56.00	9.75±5.66	1.25±1.25	23.33±6.17	k__Fungi; p__Ascomycota; c__Dothideomycetes; o__Dothideales; f__Aureobasidiaceae; g__Aureobasidium; s__Aureobasidium_pullulans	Aureobasidium	13	Pathotroph-Saprotroph-Symbiotroph	Animal Pathogen-Endophyte-Epiphyte-Plant Pathogen-Undefined Saprotroph	Facultative Yeast	NULL	Possible	NULL	Costa IPMW, et al. 2012. Mycotaxon 119:26; Tedersoo L, et al. 2014. Science 346:1256688; Wachowska U, Glowacka K. 2014. Biocontrol 59:pp 635-645; Irinyia L, Lacknerb M, de Hoog GS, Meyer W. 2016. Fungal Biology 120:125-136; http://www.apsnet.org/publications/commonnames/Pages/default.aspx
ASV41	22.75±17.52	48.00±20.46	1.25±1.25	20.33±2.18	k__Fungi; p__Ascomycota; c__Sordariomycetes; o__Trichosphaeriales; f__Trichosphaeriaceae; g__Nigrospora; s__Nigrospora_oryzae	Nigrospora	13	Saprotroph	Undefined Saprotroph	NULL	NULL	Probable	NULL	Tedersoo L, et al. 2014. Science 346:1256688
ASV50	31.25±23.92	7.00±4.22	0.00±0.00	26.33±13.69	k__Fungi; p__Ascomycota; c__Dothideomycetes; o__Dothideales; f__Aureobasidiaceae; g__Aureobasidium; s__Aureobasidium_pullulans	Aureobasidium	13	Pathotroph-Saprotroph-Symbiotroph	Animal Pathogen-Endophyte-Epiphyte-Plant Pathogen-Undefined Saprotroph	Facultative Yeast	NULL	Possible	NULL	Costa IPMW, et al. 2012. Mycotaxon 119:26; Tedersoo L, et al. 2014. Science 346:1256688; Wachowska U, Glowacka K. 2014. Biocontrol 59:pp 635-645; Irinyia L, Lacknerb M, de Hoog GS, Meyer W. 2016. Fungal Biology 120:125-136; http://www.apsnet.org/publications/commonnames/Pages/default.aspx
ASV52	14.50±12.19	8.50±2.87	0.00±0.00	43.33±39.40	k__Fungi; p__Ascomycota; c__Dothideomycetes; o__Pleosporales; f__Phaeosphaeriaceae; g__Sclerostagonospora; s__Sclerostagonospora_rosae	Sclerostagonospora	13	Saprotroph	Undefined Saprotroph	NULL	NULL	Probable	NULL	Tedersoo L, et al. 2014. Science 346:1256688
ASV59	11.75±4.93	13.50±5.18	1.25±1.25	11.33±11.33	k__Fungi; p__Ascomycota; c__Dothideomycetes; o__Dothideales; f__Aureobasidiaceae; g__Aureobasidium; s__Aureobasidium_pullulans	Aureobasidium	13	Pathotroph-Saprotroph-Symbiotroph	Animal Pathogen-Endophyte-Epiphyte-Plant Pathogen-Undefined Saprotroph	Facultative Yeast	NULL	Possible	NULL	Costa IPMW, et al. 2012. Mycotaxon 119:26; Tedersoo L, et al. 2014. Science 346:1256688; Wachowska U, Glowacka K. 2014. Biocontrol 59:pp 635-645; Irinyia L, Lacknerb M, de Hoog GS, Meyer W. 2016. Fungal Biology 120:125-136; http://www.apsnet.org/publications/commonnames/Pages/default.aspx
ASV63	23.25±20.98	5.25±1.03	0.00±0.00	6.33±1.20	k__Fungi; p__Ascomycota; c__Sordariomycetes; o__Hypocreales; f__Bionectriaceae; g__Clonostachys; s__	Clonostachys	13	Pathotroph	Plant Pathogen	NULL	NULL	Probable	NULL	Tedersoo L, et al. 2014. Science 346:1256688
ASV60	1.25±0.94	3.00±1.22	1.50±1.50	36.00±34.01	k__Fungi; p__Ascomycota; c__Dothideomycetes; o__Dothideales; f__Dothideaceae; g__Dothidea; s__Dothidea_sambuci	Dothidea	13	Pathotroph-Saprotroph-Symbiotroph	Endophyte-Plant Pathogen-Undefined Saprotroph	Microfungus	NULL	Probable	NULL	Tedersoo L, et al. 2014. Science 346:1256688
ASV64	9.75±9.75	11.00±5.36	4.50±3.06	8.66±2.18	k__Fungi; p__Ascomycota; c__Dothideomycetes; o__Botryosphaeriales; f__Botryosphaeriaceae; g__Botryosphaeria	Botryosphaeria	13	Pathotroph	Plant Pathogen	Microfungus	NULL	Probable	NULL	Tedersoo L, et al. 2014. Science 346:1256688
ASV65	6.00±3.55	0.00±0.00	0.00±0.00	29.33±24.04	k__Fungi; p__Ascomycota; c__Dothideomycetes; o__Pleosporales; f__Didymosphaeriaceae; g__Paraconiothyrium; s__Paraconiothyrium_archidendri	Paraconiothyrium	13	Saprotroph	Undefined Saprotroph	NULL	NULL	Probable	NULL	Tedersoo L, et al. 2014. Science 346:1256688
ASV69	4.50±2.87	21.25±8.67	0.75±0.75	1.33±1.33	k__Fungi; p__Ascomycota; c__Dothideomycetes; o__Pleosporales; f__Periconiaceae; g__Periconia; s__	Periconia	13	Pathotroph-Saprotroph	Endophyte-Plant Pathogen-Wood Saprotroph	NULL	Soft Rot	Possible	Host of endophyte - Asteraceae, Musaceae	Duncan CG, Eslyn WE. 1966. Mycologia 58:642-645; Costa IPMW, et al. 2012. Mycotaxon 119:26
ASV73	11.75±9.27	6.00±6.00	0.00±0.00	11.00±7.00	k__Fungi; p__Ascomycota; c__Sordariomycetes; o__Diaporthales; f__Diaporthaceae; g__Diaporthe	Diaporthe	13	Pathotroph-Symbiotroph	Endophyte-Plant Pathogen	Microfungus	NULL	Probable	NULL	Tedersoo L, et al. 2014. Science 346:1256688
ASV70	16.50±16.50	5.00±3.78	0.00±0.00	5.33±5.33	k__Fungi; p__Ascomycota; c__Sordariomycetes; o__Hypocreales; f__Nectriaceae	Hypocreales	7	Saprotroph	Undefined Saprotroph	Microfungus	NULL	Possible	NULL	Sterkenburg E, et al. 2015. New Phytologist 207:1145-1158
ASV71	0.00±0.00	6.75±6.75	6.25±6.25	16.66±8.81	k__Fungi; p__Ascomycota; c__Eurotiomycetes; o__Chaetothyriales; f__Trichomeriaceae; g__Trichomerium; s__Trichomerium_dioscoreae	Trichomerium	13	Symbiotroph	Endophyte	NULL	NULL	Probable	NULL	Tedersoo L, et al. 2014. Science 346:1256688
ASV79	0.00±0.00	2.75±2.75	0.00±0.00	30.33±30.33	k__Fungi; p__Ascomycota; c__Dothideomycetes; o__Capnodiales; f__Cladosporiaceae; g__Cladosporium; s__Cladosporium_sphaerospermum	Cladosporium	13	Pathotroph-Symbiotroph	Endophyte-Plant Pathogen	Microfungus	NULL	Possible	Host - Fabaceae	http://www.apsnet.org/publications/commonnames/Pages/default.aspx
ASV80	0.00±0.00	0.00±0.00	0.00±0.00	32.33±15.05	k__Fungi; p__Ascomycota; c__Dothideomycetes; o__Capnodiales; f__Cladosporiaceae; g__Cladosporium; s__Cladosporium_velox	Cladosporium	13	Pathotroph-Symbiotroph	Endophyte-Plant Pathogen	Microfungus	NULL	Possible	Host - Fabaceae	http://www.apsnet.org/publications/commonnames/Pages/default.aspx
ASV77	18.50±18.50	3.00±1.77	0.00±0.00	3.00±2.08	k__Fungi; p__Ascomycota; c__Eurotiomycetes; o__Eurotiales; f__Aspergillaceae; g__Penicillium; s__Penicillium_oxalicum	Eurotiales	7	Saprotroph	Undefined Saprotroph	Microfungus	NULL	Possible	NULL	Sterkenburg E, et al. 2015. New Phytologist 207:1145-1158
ASV81	15.25±15.25	1.50±1.50	0.00±0.00	8.00±4.16	k__Fungi; p__Ascomycota; c__Dothideomycetes; o__Pleosporales; f__Phaeosphaeriaceae; g__Phaeosphaeria; s__Phaeosphaeria_oryzae	Phaeosphaeria	13	Saprotroph	Undefined Saprotroph	NULL	NULL	Probable	NULL	Tedersoo L, et al. 2014. Science 346:1256688
ASV83	4.25±4.25	1.25±1.25	10.25±7.81	9.33±9.33	k__Fungi; p__Ascomycota; c__Dothideomycetes; o__Pleosporales; f__Didymosphaeriaceae; g__Paraconiothyrium; s__Paraconiothyrium_fungicola	Paraconiothyrium	13	Saprotroph	Undefined Saprotroph	NULL	NULL	Probable	NULL	Tedersoo L, et al. 2014. Science 346:1256688
ASV82	19.5±19.16	1.25±1.25	0.00±0.00	1.66±1.66	k__Fungi; p__Ascomycota; c__Dothideomycetes; o__Pleosporales; f__Phaeosphaeriaceae; g__Phaeosphaeria; s__Phaeosphaeria_podocarpi	Phaeosphaeria	13	Saprotroph	Undefined Saprotroph	NULL	NULL	Probable	NULL	Tedersoo L, et al. 2014. Science 346:1256688
ASV87	6.75±2.75	7.00±1.58	1.00±1.00	6.66±4.05	k__Fungi; p__Ascomycota; c__Sordariomycetes; o__Hypocreales; f__Hypocreales_fam_Incertae_sedis; g__Ustilaginoidea; s__Ustilaginoidea_virens	Ustilaginoidea	13	Pathotroph-Symbiotroph	Clavicipitaceous Endophyte-Plant Pathogen	NULL	NULL	Possible	NULL	Lane GA, et al. 2000. In: Microbial Endophytes. Eds.: Bacon CW, White Jr. JF. Marcel Dekker, New York; http://www.apsnet.org/publications/commonnames/Pages/default.aspx
ASV89	0.00±0.00	0.00±0.00	1.50±1.50	22.66±12.03	k__Fungi; p__Ascomycota; c__Dothideomycetes; o__Dothideales; f__Aureobasidiaceae; g__Aureobasidium; s__Aureobasidium_pullulans	Aureobasidium	13	Pathotroph-Saprotroph-Symbiotroph	Animal Pathogen-Endophyte-Epiphyte-Plant Pathogen-Undefined Saprotroph	Facultative Yeast	NULL	Possible	NULL	Costa IPMW, et al. 2012. Mycotaxon 119:26; Tedersoo L, et al. 2014. Science 346:1256688; Wachowska U, Glowacka K. 2014. Biocontrol 59:pp 635-645; Irinyia L, Lacknerb M, de Hoog GS, Meyer W. 2016. Fungal Biology 120:125-136; http://www.apsnet.org/publications/commonnames/Pages/default.aspx
ASV88	1.50±0.95	0.75±0.75	0.00±0.00	21.00±21.00	k__Fungi; p__Ascomycota; c__Sordariomycetes; o__Hypocreales; f__Hypocreales_fam_Incertae_sedis; g__Sporidesmium; s__Sporidesmium_melaleucae	Hypocreales	7	Saprotroph	Undefined Saprotroph	Microfungus	NULL	Possible	NULL	Sterkenburg E, et al. 2015. New Phytologist 207:1145-1158
ASV94	10.75±10.75	4.50±3.86	0.00±0.00	2.66±2.66	k__Fungi; p__Ascomycota; c__Sordariomycetes; o__Trichosphaeriales; f__Trichosphaeriaceae; g__Nigrospora; s__Nigrospora_oryzae	Nigrospora	13	Saprotroph	Undefined Saprotroph	NULL	NULL	Probable	NULL	Tedersoo L, et al. 2014. Science 346:1256688
ASV92	0.00±0.00	13.50±13.50	0.00±0.00	4.00±4.00	k__Fungi; p__Ascomycota; c__Sordariomycetes; o__Diaporthales; f__Diaporthaceae; g__Diaporthe	Diaporthe	13	Pathotroph-Symbiotroph	Endophyte-Plant Pathogen	Microfungus	NULL	Probable	NULL	Tedersoo L, et al. 2014. Science 346:1256688
ASV93	2.75±2.75	0.00±0.00	0.00±0.00	18.33±16.85	k__Fungi; p__Ascomycota; c__Dothideomycetes; o__Pleosporales; f__Lentitheciaceae; g__Keissleriella; s__Keissleriella_poagena	Keissleriella	13	Saprotroph	Undefined Saprotroph	NULL	NULL	Probable	NULL	Tedersoo L, et al. 2014. Science 346:1256688
ASV96	0.00±0.00	2.50±2.50	12.00±10.09	0.00±0.00	k__Fungi; p__Ascomycota; c__Eurotiomycetes; o__Chaetothyriales; f__Trichomeriaceae; g__Trichomerium; s__Trichomerium_dioscoreae	Trichomerium	13	Symbiotroph	Endophyte	NULL	NULL	Probable	NULL	Tedersoo L, et al. 2014. Science 346:1256688
ASV101	9.00±5.58	3.50±3.50	0.00±0.00	2.33±2.33	k__Fungi; p__Ascomycota; c__Dothideomycetes; o__Pleosporales; f__Corynesporascaceae; g__Corynespora; s__Corynespora_cassiicola	Corynespora	13	Saprotroph	Undefined Saprotroph	NULL	NULL	Probable	NULL	Tedersoo L, et al. 2014. Science 346:1256688
ASV103	9.00±5.44	0.00±0.00	0.00±0.00	5.66±5.66	k__Fungi; p__Ascomycota; c__Dothideomycetes; o__Capnodiales; f__Cladosporiaceae; g__Cladosporium; s__Cladosporium_cladosporioides	Cladosporium	13	Pathotroph-Symbiotroph	Endophyte-Plant Pathogen	Microfungus	NULL	Possible	Host - Fabaceae	http://www.apsnet.org/publications/commonnames/Pages/default.aspx
ASV104	0.00±0.00	0.00±0.00	0.00±0.00	17.66±10.91	k__Fungi; p__Ascomycota; c__Dothideomycetes; o__Capnodiales; f__Cladosporiaceae; g__Toxicocladosporium; s__Toxicocladosporium_rubrigenum	Toxicocladosporium	13	Pathotroph-Symbiotroph	Endophyte-Plant Pathogen	Microfungus	NULL	Probable	Isolated from leaves of Posoqueria and Eucalyptus camaldulensis (occurring within a single small lesion) as well as moldy paint	Crous PW, et al. 2009. Persoonia 22:83-94
ASV105	0.00±0.00	1.75±1.03	0.00±0.00	13.00±13.00	k__Fungi; p__Ascomycota; c__Leotiomycetes; o__Helotiales; f__Dermateaceae; g__Neofabraea; s__Neofabraea_vagabunda	Neofabraea	13	Pathotroph	Plant Pathogen	NULL	NULL	Probable	Neofabraea species are pathogenic to their hosts, and are reported as causal agents of many plant diseases.	Chen C, et al. 2015. Fungal Biology 10.1016/j.funbio.2015.09.013; Tedersoo L, et al. 2014. Science 346:1256688
ASV112	0.00±0.00	0.00±0.00	4.75±4.75	9.00±9.00	k__Fungi; p__Ascomycota; c__Dothideomycetes; o__Pleosporales; f__Didymosphaeriaceae; g__Paraconiothyrium	Paraconiothyrium	13	Saprotroph	Undefined Saprotroph	NULL	NULL	Probable	NULL	Tedersoo L, et al. 2014. Science 346:1256688
ASV111	7.00±7.00	1.75±1.75	0.00±0.00	3.00±3.00	k__Fungi; p__Ascomycota; c__Dothideomycetes; o__Pleosporales; f__Phaeosphaeriaceae; g__Neosetophoma; s__Neosetophoma_samararum	Neosetophoma	13	Saprotroph	Undefined Saprotroph	NULL	NULL	Probable	NULL	Tedersoo L, et al. 2014. Science 346:1256688
ASV114	1.00±0.70	2.50±2.50	0.00±0.00	10.00±6.08	k__Fungi; p__Ascomycota; c__Sordariomycetes; o__Hypocreales; f__Nectriaceae; g__Fusarium; s__Fusarium_lacertarum	Fusarium	13	Pathotroph-Saprotroph	Plant Pathogen-Soil Saprotroph-Wood Saprotroph	NULL	Soft Rot	Probable	NULL	Duncan CG, Eslyn WE. 1966. Mycologia 58:642-664; Seehann G, et al. 1975. List of Fungi in Soft-Rot Tissue Tests. Institute fur Holzbiologie und Holzschutz, Bundesforschungsanstalt fur Forst - und Holzwirtshaft, Hamburg - Lohbrugge, Germany; Tedersoo L, et al. 2014. Science 346:1256688; Schroers et al. 2016. Mycologia 108:806-819.
ASV115	2.00±2.00	7.00±7.00	0.00±0.00	0.00±0.00	k__Fungi; p__Ascomycota; c__Sordariomycetes; o__Diaporthales; f__Diaporthaceae; g__Diaporthe	Diaporthe	13	Pathotroph-Symbiotroph	Endophyte-Plant Pathogen	Microfungus	NULL	Probable	NULL	Tedersoo L, et al. 2014. Science 346:1256688
ASV119	1.25±1.25	5.25±5.25	2.50±2.50	0.00±0.00	k__Fungi; p__Ascomycota; c__Sordariomycetes; o__Togniniales; f__Togniniaceae; g__Phaeoacremonium	Phaeoacremonium	13	Pathotroph	Plant Pathogen	NULL	NULL	Probable	NULL	Tedersoo L, et al. 2014. Science 346:1256688
ASV123	3.75±3.75	0.00±0.00	0.00±0.00	6.66±3.38	k__Fungi; p__Basidiomycota; c__Tremellomycetes; o__Tremellales; f__Bulleribasidiaceae; g__Hannaella; s__Hannaella_sinensis	Tremellales	7	Pathotroph-Saprotroph-Symbiotroph	Fungal Parasite-Undefined Saprotroph	Tremelloid-Yeast	NULL	Possible	The order contains both teleomorphic and anamorphic species, most of the latter being yeasts	Sterkenburg E, et al. 2015. New Phytologist 207:1145-1158
ASV126	8.75±8.75	0.00±0.00	0.00±0.00	0.00±0.00	k__Fungi; p__Ascomycota; c__Dothideomycetes; o__Pleosporales; f__Phaeosphaeriaceae; g__Phaeosphaeria	Phaeosphaeria	13	Saprotroph	Undefined Saprotroph	NULL	NULL	Probable	NULL	Tedersoo L, et al. 2014. Science 346:1256688
ASV127	8.00±8.00	0.00±0.00	0.00±0.00	0.00±0.00	k__Fungi; p__Ascomycota; c__Sordariomycetes; o__Hypocreales; f__Nectriaceae; g__Fusarium	Fusarium	13	Pathotroph-Saprotroph	Plant Pathogen-Soil Saprotroph-Wood Saprotroph	NULL	Soft Rot	Probable	NULL	Duncan CG, Eslyn WE. 1966. Mycologia 58:642-664; Seehann G, et al. 1975. List of Fungi in Soft-Rot Tissue Tests. Institute fur Holzbiologie und Holzschutz, Bundesforschungsanstalt fur Forst - und Holzwirtshaft, Hamburg - Lohbrugge, Germany; Tedersoo L, et al. 2014. Science 346:1256688; Schroers et al. 2016. Mycologia 108:806-819.
ASV130	4.50±4.50	2.75±1.60	0.00±0.00	0.00±0.00	k__Fungi; p__Ascomycota; c__Sordariomycetes; o__Hypocreales; f__Nectriaceae	Hypocreales	7	Saprotroph	Undefined Saprotroph	Microfungus	NULL	Possible	NULL	Sterkenburg E, et al. 2015. New Phytologist 207:1145-1158
ASV131	0.00±0.00	3.25±2.92	0.00±0.00	4.66±2.40	k__Fungi; p__Ascomycota; c__Dothideomycetes; o__Capnodiales; f__Mycosphaerellaceae; g__Cercospora; s__Cercospora_kikuchii	Cercospora	13	Pathotroph	Plant Pathogen	Microfungus	NULL	Probable	NULL	http://www.apsnet.org/publications/commonnames/Pages/default.aspx
ASV138	2.00±2.00	0.00±0.00	1.25±1.25	2.66±2.66	k__Fungi; p__Ascomycota; c__Sordariomycetes; o__Hypocreales; f__Nectriaceae; g__Fusarium; s__Fusarium_lacertarum	Fusarium	13	Pathotroph-Saprotroph	Plant Pathogen-Soil Saprotroph-Wood Saprotroph	NULL	Soft Rot	Probable	NULL	Duncan CG, Eslyn WE. 1966. Mycologia 58:642-664; Seehann G, et al. 1975. List of Fungi in Soft-Rot Tissue Tests. Institute fur Holzbiologie und Holzschutz, Bundesforschungsanstalt fur Forst - und Holzwirtshaft, Hamburg - Lohbrugge, Germany; Tedersoo L, et al. 2014. Science 346:1256688; Schroers et al. 2016. Mycologia 108:806-819.
ASV140	0.00±0.00	1.25±1.25	3.50±3.50	0.00±0.00	k__Fungi; p__Ascomycota; c__Dothideomycetes; o__Capnodiales; f__Mycosphaerellaceae; g__Sphaerulina	Sphaerulina	13	Symbiotroph	Lichenized	Thallus	NULL	Highly Probable	NULL	Esslinger TL. 2014. North Dakota State University (http://www.ndsu.edu/pubweb/~esslinge/chcklst/chcklst7.htm)
ASV143	0.00±0.00	4.00±4.00	0.00±0.00	0.00±0.00	k__Fungi; p__Ascomycota; c__Dothideomycetes; o__Botryosphaeriales; f__Botryosphaeriaceae; g__Dothiorella	Dothiorella	13	Pathotroph	Plant Pathogen	Microfungus	NULL	Probable	NULL	Tedersoo L, et al. 2014. Science 346:1256688
ASV146	3.50±3.50	0.00±0.00	0.00±0.00	0.66±0.66	k__Fungi; p__Ascomycota; c__Leotiomycetes; o__Erysiphales; f__Erysiphaceae; g__Sawadaea; s__Sawadaea_nankinensis	Sawadaea	13	Pathotroph	Plant Pathogen	NULL	NULL	Probable	NULL	Tedersoo L, et al. 2014. Science 346:1256688
ASV148	0.00±0.00	0.00±0.00	0.00±0.00	5.33±5.33	k__Fungi; p__Ascomycota; c__Dothideomycetes; o__Capnodiales; f__Cladosporiaceae; g__Cladosporium	Cladosporium	13	Pathotroph-Symbiotroph	Endophyte-Plant Pathogen	Microfungus	NULL	Possible	Host - Fabaceae	http://www.apsnet.org/publications/commonnames/Pages/default.aspx
ASV151	1.00±1.00	1.00±0.57	0.00±0.00	1.66±1.66	k__Fungi; p__Ascomycota; c__Dothideomycetes; o__Pleosporales; f__Phaeosphaeriaceae; g__Phaeosphaeria; s__Phaeosphaeria_fuckelii	Phaeosphaeria	13	Saprotroph	Undefined Saprotroph	NULL	NULL	Probable	NULL	Tedersoo L, et al. 2014. Science 346:1256688
ASV155	0.00±0.00	0.75±0.75	0.00±0.00	3.33±3.33	k__Fungi; p__Ascomycota; c__Sordariomycetes; o__Hypocreales; f__Nectriaceae; g__Microcera; s__Microcera_rubra	Hypocreales	7	Saprotroph	Undefined Saprotroph	Microfungus	NULL	Possible	NULL	Sterkenburg E, et al. 2015. New Phytologist 207:1145-1158
ASV156	0.00±0.00	0.00±0.00	0.00±0.00	4.33±4.33	k__Fungi; p__Ascomycota; c__Dothideomycetes; o__Pleosporales; f__Phaeosphaeriaceae; g__Phaeosphaeria; s__Phaeosphaeria_podocarpi	Phaeosphaeria	13	Saprotroph	Undefined Saprotroph	NULL	NULL	Probable	NULL	Tedersoo L, et al. 2014. Science 346:1256688
ASV164	3.25±3.25	0.00±0.00	0.00±0.00	0.00±0.00	k__Fungi; p__Ascomycota; c__Sordariomycetes; o__Trichosphaeriales; f__Trichosphaeriaceae; g__Nigrospora; s__Nigrospora_oryzae	Nigrospora	13	Saprotroph	Undefined Saprotroph	NULL	NULL	Probable	NULL	Tedersoo L, et al. 2014. Science 346:1256688
ASV159	0.00±0.00	1.25±1.25	0.00±0.00	2.33±2.33	k__Fungi; p__Ascomycota; c__Sordariomycetes; o__Diaporthales; f__Diaporthaceae; g__Diaporthe	Diaporthe	13	Pathotroph-Symbiotroph	Endophyte-Plant Pathogen	Microfungus	NULL	Probable	NULL	Tedersoo L, et al. 2014. Science 346:1256688
ASV162	3.00±3.00	0.00±0.00	0.00±0.00	0.00±0.00	k__Fungi; p__Ascomycota; c__Sordariomycetes; o__Diaporthales; f__Diaporthaceae; g__Diaporthe	Diaporthe	13	Pathotroph-Symbiotroph	Endophyte-Plant Pathogen	Microfungus	NULL	Probable	NULL	Tedersoo L, et al. 2014. Science 346:1256688
ASV157	0.00±0.00	0.75±0.75	2.00±2.00	0.00±0.00	k__Fungi; p__Ascomycota; c__Sordariomycetes; o__Hypocreales; f__Nectriaceae; g__Microcera; s__Microcera_rubra	Hypocreales	7	Saprotroph	Undefined Saprotroph	Microfungus	NULL	Possible	NULL	Sterkenburg E, et al. 2015. New Phytologist 207:1145-1158
ASV163	2.75±2.75	0.00±0.00	0.00±0.00	0.00±0.00	k__Fungi; p__Ascomycota; c__Eurotiomycetes; o__Chaetothyriales; f__Trichomeriaceae; g__Trichomerium; s__Trichomerium_dioscoreae	Trichomerium	13	Symbiotroph	Endophyte	NULL	NULL	Probable	NULL	Tedersoo L, et al. 2014. Science 346:1256688
ASV167	0.00±0.00	0.00±0.00	0.00±0.00	3.66±3.66	k__Fungi; p__Ascomycota; c__Dothideomycetes; o__Capnodiales; f__Cladosporiaceae; g__Cladosporium; s__Cladosporium_sphaerospermum	Cladosporium	13	Pathotroph-Symbiotroph	Endophyte-Plant Pathogen	Microfungus	NULL	Possible	Host - Fabaceae	http://www.apsnet.org/publications/commonnames/Pages/default.aspx
ASV160	0.00±0.00	0.50±0.50	2.00±2.00	0.00±0.00	k__Fungi; p__Basidiomycota; c__Agaricomycetes; o__Russulales; f__Peniophoraceae; g__Peniophora; s__Peniophora_limitata	Peniophora	13	Saprotroph	Undefined Saprotroph	Resupinate	White Rot	Probable	NULL	Tedersoo L, et al. 2014. Science 346:1256688
ASV171	0.00±0.00	2.50±2.50	0.00±0.00	0.00±0.00	k__Fungi; p__Ascomycota; c__Dothideomycetes; o__Capnodiales; f__Cladosporiaceae; g__Cladosporium	Cladosporium	13	Pathotroph-Symbiotroph	Endophyte-Plant Pathogen	Microfungus	NULL	Possible	Host - Fabaceae	http://www.apsnet.org/publications/commonnames/Pages/default.aspx
ASV174	0.00±0.00	0.00±0.00	0.00±0.00	3.33±3.33	k__Fungi; p__Ascomycota; c__Dothideomycetes; o__Pleosporales; f__Pleosporaceae; g__Bipolaris; s__Bipolaris_yamadae	Bipolaris	13	Pathotroph	Plant Pathogen	NULL	NULL	Probable	NULL	Tedersoo L, et al. 2014. Science 346:1256688
ASV191	0.00±0.00	2.50±2.50	0.00±0.00	0.00±0.00	k__Fungi; p__Ascomycota; c__Sordariomycetes; o__Diaporthales; f__Diaporthaceae; g__Diaporthe	Diaporthe	13	Pathotroph-Symbiotroph	Endophyte-Plant Pathogen	Microfungus	NULL	Probable	NULL	Tedersoo L, et al. 2014. Science 346:1256688
ASV173	2.00±2.00	0.00±0.00	0.25±0.25	0.00±0.00	k__Fungi; p__Basidiomycota; c__Tremellomycetes; o__Tremellales; f__Rhynchogastremataceae; g__Papiliotrema; s__Papiliotrema_japonica	Tremellales	7	Pathotroph-Saprotroph-Symbiotroph	Fungal Parasite-Undefined Saprotroph	Tremelloid-Yeast	NULL	Possible	The order contains both teleomorphic and anamorphic species, most of the latter being yeasts	Sterkenburg E, et al. 2015. New Phytologist 207:1145-1158
ASV175	1.50±1.50	0.75±0.75	0.00±0.00	0.00±0.00	k__Fungi; p__Ascomycota; c__Dothideomycetes; o__Pleosporales; f__Phaeosphaeriaceae; g__Phaeosphaeria	Phaeosphaeria	13	Saprotroph	Undefined Saprotroph	NULL	NULL	Probable	NULL	Tedersoo L, et al. 2014. Science 346:1256688
ASV178	0.00±0.00	0.00±0.00	2.25±2.25	0.00±0.00	k__Fungi; p__Ascomycota; c__Sordariomycetes; o__Diaporthales; f__Diaporthaceae; g__Diaporthe	Diaporthe	13	Pathotroph-Symbiotroph	Endophyte-Plant Pathogen	Microfungus	NULL	Probable	NULL	Tedersoo L, et al. 2014. Science 346:1256688
ASV180	2.25±2.25	0.00±0.00	0.00±0.00	0.00±0.00	k__Fungi; p__Ascomycota; c__Dothideomycetes; o__Pleosporales; f__Phaeosphaeriaceae; g__Phaeosphaeria; s__	Phaeosphaeria	13	Saprotroph	Undefined Saprotroph	NULL	NULL	Probable	NULL	Tedersoo L, et al. 2014. Science 346:1256688
ASV181	2.25±2.25	0.00±0.00	0.00±0.00	0.00±0.00	k__Fungi; p__Ascomycota; c__Dothideomycetes; o__Capnodiales; f__Mycosphaerellaceae; g__Sphaerulina	Sphaerulina	13	Symbiotroph	Lichenized	Thallus	NULL	Highly Probable	NULL	Esslinger TL. 2014. North Dakota State University (http://www.ndsu.edu/pubweb/~esslinge/chcklst/chcklst7.htm)
ASV182	2.25±1.31	0.00±0.00	0.00±0.00	0.00±0.00	k__Fungi; p__Ascomycota; c__Sordariomycetes; o__Hypocreales; f__Hypocreales_fam_Incertae_sedis; g__Acremonium; s__Acremonium_roseolum	Acremonium	13	Pathogen-Saprotroph-Symbiotroph	Animal Pathogen-Endophyte-Fungal Parasite-Plant Pathogen-Wood Saprotroph	Microfungus	Soft Rot	Possible	Endophyte detection method-culture (Hanada et al. 2010, Del Olmo-Ruiz & Arnold 2014); Likely opportunistic human pathogen (Irinyi et al. 2015)	Duncan CG, Eslyn WE. 1966. Mycologia 58:642-64; Nilsson T. 1973. Studies on wood degradation and cellulolytic activity of microfungi. No. 104; Worrall JJ, et al. 1997. Mycologia 89: 199-219; Hanada RE, et al. 2010. Fungal Biology 114:901-910; Del Olmo-Ruiz M, Arnold AE. 2014. Mycologia 106:8-21; Tedersoo L, et al. 2014. Science 346:1256688; Irinyi L, et al. 2015. Medical Mycology 53:313-337
ASV184	2.25±2.25	0.00±0.00	0.00±0.00	0.00±0.00	k__Fungi; p__Ascomycota; c__Eurotiomycetes; o__Chaetothyriales; f__Cyphellophoraceae; g__Cyphellophora; s__Cyphellophora_fusarioides	Cyphellophora	13	Saprotroph	Undefined Saprotroph	NULL	NULL	Probable	NULL	Tedersoo L, et al. 2014. Science 346:1256688
ASV188	0.00±0.00	0.00±0.00	0.00±0.00	3.00±3.00	k__Fungi; p__Ascomycota; c__Dothideomycetes; o__Dothideomycetes_ord_Incertae_sedis; f__Dothideomycetes_fam_Incertae_sedis; g__Peltaster	Peltaster	13	Pathotroph	Plant Pathogen	NULL	NULL	Probable	NULL	http://www.apsnet.org/publications/commonnames/Pages/default.aspx
ASV193	2.25±2.25	0.00±0.00	0.00±0.00	0.00±0.00	k__Fungi; p__Ascomycota; c__Dothideomycetes; o__Dothideales; f__Aureobasidiaceae; g__Aureobasidium; s__Aureobasidium_pullulans	Aureobasidium	13	Pathotroph-Saprotroph-Symbiotroph	Animal Pathogen-Endophyte-Epiphyte-Plant Pathogen-Undefined Saprotroph	Facultative Yeast	NULL	Possible	NULL	Costa IPMW, et al. 2012. Mycotaxon 119:26; Tedersoo L, et al. 2014. Science 346:1256688; Wachowska U, Glowacka K. 2014. Biocontrol 59:pp 635-645; Irinyia L, Lacknerb M, de Hoog GS, Meyer W. 2016. Fungal Biology 120:125-136; http://www.apsnet.org/publications/commonnames/Pages/default.aspx
ASV218	0.00±0.00	2.25±2.25	0.00±0.00	0.00±0.00	k__Fungi; p__Ascomycota; c__Dothideomycetes; o__Pleosporales; f__Corynesporascaceae; g__Corynespora; s__Corynespora_cassiicola	Corynespora	13	Saprotroph	Undefined Saprotroph	NULL	NULL	Probable	NULL	Tedersoo L, et al. 2014. Science 346:1256688
ASV183	2.00±2.00	0.00±0.00	0.00±0.00	0.00±0.00	k__Fungi; p__Basidiomycota; c__Agaricomycetes; o__Russulales; f__Peniophoraceae; g__Peniophora; s__Peniophora_limitata	Peniophora	13	Saprotroph	Undefined Saprotroph	Resupinate	White Rot	Probable	NULL	Tedersoo L, et al. 2014. Science 346:1256688
ASV189	0.00±0.00	2.00±2.00	0.00±0.00	0.00±0.00	k__Fungi; p__Ascomycota; c__Sordariomycetes; o__Glomerellales; f__Glomerellaceae; g__Colletotrichum; s__Colletotrichum_gloeosporioides	Colletotrichum	13	Pathotroph-Symbiotroph	Endophyte-Plant Pathogen	Microfungus	NULL	Probable	NULL	Costa IPMW, et al. 2012. Mycotaxon 119:26; Tedersoo L, et al. 2014. Science 346:1256688; http://www.apsnet.org/publications/commonnames/Pages/default.aspx
ASV190	0.00±0.00	2.00±2.00	0.00±0.00	0.00±0.00	k__Fungi; p__Ascomycota; c__Sordariomycetes; o__Togniniales; f__Togniniaceae; g__Phaeoacremonium; s__Phaeoacremonium_hungaricum	Phaeoacremonium	13	Pathotroph	Plant Pathogen	NULL	NULL	Probable	NULL	Tedersoo L, et al. 2014. Science 346:1256688
ASV195	2.00±2.00	0.00±0.00	0.00±0.00	0.00±0.00	k__Fungi; p__Ascomycota; c__Dothideomycetes; o__Pleosporales; f__Pleosporaceae; g__Curvularia	Curvularia	13	Pathotroph	Plant Pathogen	NULL	NULL	Probable	NULL	Tedersoo L, et al. 2014. Science 346:1256688
ASV209	0.00±0.00	0.00±0.00	2.00±2.00	0.00±0.00	k__Fungi; p__Ascomycota; c__Dothideomycetes; o__Dothideales; f__Aureobasidiaceae; g__Aureobasidium; s__Aureobasidium_pullulans	Aureobasidium	13	Pathotroph-Saprotroph-Symbiotroph	Animal Pathogen-Endophyte-Epiphyte-Plant Pathogen-Undefined Saprotroph	Facultative Yeast	NULL	Possible	NULL	Costa IPMW, et al. 2012. Mycotaxon 119:26; Tedersoo L, et al. 2014. Science 346:1256688; Wachowska U, Glowacka K. 2014. Biocontrol 59:pp 635-645; Irinyia L, Lacknerb M, de Hoog GS, Meyer W. 2016. Fungal Biology 120:125-136; http://www.apsnet.org/publications/commonnames/Pages/default.aspx
ASV198	0.00±0.00	0.00±0.00	0.00±0.00	2.33±2.33	k__Fungi; p__Ascomycota; c__Dothideomycetes; o__Pleosporales; f__Phaeosphaeriaceae; g__Neosetophoma	Neosetophoma	13	Saprotroph	Undefined Saprotroph	NULL	NULL	Probable	NULL	Tedersoo L, et al. 2014. Science 346:1256688
ASV199	0.00±0.00	0.00±0.00	0.75±0.75	1.33±1.33	k__Fungi; p__Ascomycota; c__Sordariomycetes; o__Hypocreales; f__Nectriaceae; g__Fusarium	Fusarium	13	Pathotroph-Saprotroph	Plant Pathogen-Soil Saprotroph-Wood Saprotroph	NULL	Soft Rot	Probable	NULL	Duncan CG, Eslyn WE. 1966. Mycologia 58:642-664; Seehann G, et al. 1975. List of Fungi in Soft-Rot Tissue Tests. Institute fur Holzbiologie und Holzschutz, Bundesforschungsanstalt fur Forst - und Holzwirtshaft, Hamburg - Lohbrugge, Germany; Tedersoo L, et al. 2014. Science 346:1256688; Schroers et al. 2016. Mycologia 108:806-819.
ASV203	0.00±0.00	1.75±1.75	0.00±0.00	0.00±0.00	k__Fungi; p__Ascomycota; c__Sordariomycetes; o__Hypocreales; f__Nectriaceae; g__Fusarium	Fusarium	13	Pathotroph-Saprotroph	Plant Pathogen-Soil Saprotroph-Wood Saprotroph	NULL	Soft Rot	Probable	NULL	Duncan CG, Eslyn WE. 1966. Mycologia 58:642-664; Seehann G, et al. 1975. List of Fungi in Soft-Rot Tissue Tests. Institute fur Holzbiologie und Holzschutz, Bundesforschungsanstalt fur Forst - und Holzwirtshaft, Hamburg - Lohbrugge, Germany; Tedersoo L, et al. 2014. Science 346:1256688; Schroers et al. 2016. Mycologia 108:806-819.
ASV204	0.50±0.50	1.25±1.25	0.00±0.00	0.00±0.00	k__Fungi; p__Ascomycota; c__Sordariomycetes; o__Xylariales; f__Diatrypaceae; g__Eutypella; s__	Eutypella	13	Pathotroph	Plant Pathogen	NULL	NULL	Probable	NULL	Tedersoo L, et al. 2014. Science 346:1256688
ASV205	0.00±0.00	1.75±1.03	0.00±0.00	0.00±0.00	k__Fungi; p__Ascomycota; c__Dothideomycetes; o__Pleosporales; f__Pleosporaceae; g__Exserohilum; s__Exserohilum_rostratum	Exserohilum	13	Pathotroph	Plant Pathogen	NULL	NULL	Probable	NULL	Tedersoo L, et al. 2014. Science 346:1256688
ASV207	0.00±0.00	1.75±1.75	0.00±0.00	0.00±0.00	k__Fungi; p__Basidiomycota; c__Tremellomycetes; o__Tremellales; f__Bulleribasidiaceae; g__Hannaella; s__Hannaella_sinensis	Tremellales	7	Pathotroph-Saprotroph-Symbiotroph	Fungal Parasite-Undefined Saprotroph	Tremelloid-Yeast	NULL	Possible	The order contains both teleomorphic and anamorphic species, most of the latter being yeasts	Sterkenburg E, et al. 2015. New Phytologist 207:1145-1158
ASV208	1.75±1.75	0.00±0.00	0.00±0.00	0.00±0.00	k__Fungi; p__Ascomycota; c__Sordariomycetes; o__Xylariales; f__Microdochiaceae; g__Microdochium	Microdochium	13	Pathotroph-Symbiotroph	Endophyte-Plant Pathogen	Dark Septate Endophyte	NULL	Highly Probable	NULL	Tedersoo L, et al. 2014. Science 346:1256688 (as plant pathogen); Mandyam et al. 2012. Mycorrhiza 22:109-119 (as DSE).
ASV211	0.00±0.00	1.75±1.75	0.00±0.00	0.00±0.00	k__Fungi; p__Ascomycota; c__Dothideomycetes; o__Pleosporales; f__Phaeosphaeriaceae; g__Phaeosphaeria; s__Phaeosphaeria_oryzae	Phaeosphaeria	13	Saprotroph	Undefined Saprotroph	NULL	NULL	Probable	NULL	Tedersoo L, et al. 2014. Science 346:1256688
ASV212	1.75±1.75	0.00±0.00	0.00±0.00	0.00±0.00	k__Fungi; p__Ascomycota; c__Dothideomycetes; o__Pleosporales; f__Didymosphaeriaceae; g__Paraphaeosphaeria	Paraphaeosphaeria	13	Saprotroph	Undefined Saprotroph	NULL	NULL	Probable	NULL	Tedersoo L, et al. 2014. Science 346:1256688
ASV213	0.00±0.00	1.75±1.75	0.00±0.00	0.00±0.00	k__Fungi; p__Ascomycota; c__Sordariomycetes; o__Hypocreales; f__Nectriaceae; g__Fusarium; s__Fusarium_lacertarum	Fusarium	13	Pathotroph-Saprotroph	Plant Pathogen-Soil Saprotroph-Wood Saprotroph	NULL	Soft Rot	Probable	NULL	Duncan CG, Eslyn WE. 1966. Mycologia 58:642-664; Seehann G, et al. 1975. List of Fungi in Soft-Rot Tissue Tests. Institute fur Holzbiologie und Holzschutz, Bundesforschungsanstalt fur Forst - und Holzwirtshaft, Hamburg - Lohbrugge, Germany; Tedersoo L, et al. 2014. Science 346:1256688; Schroers et al. 2016. Mycologia 108:806-819.
ASV214	1.00±1.00	0.25±0.25	0.00±0.00	0.66±0.66	k__Fungi; p__Ascomycota; c__Sordariomycetes; o__Xylariales; f__Xylariaceae; g__Zygosporium; s__Zygosporium_pseudogibbum	Zygosporium	13	Pathotroph-Symbiotroph	Endophyte-Plant Pathogen	NULL	NULL	Probable	Host - Sapotaceae	Costa IPMW, et al. 2012. Mycotaxon 119:26
ASV221	1.75±1.75	0.00±0.00	0.00±0.00	0.00±0.00	k__Fungi; p__Ascomycota; c__Sordariomycetes; o__Hypocreales; f__Nectriaceae; g__Microcera	Hypocreales	7	Saprotroph	Undefined Saprotroph	Microfungus	NULL	Possible	NULL	Sterkenburg E, et al. 2015. New Phytologist 207:1145-1158
ASV245	1.75±1.75	0.00±0.00	0.00±0.00	0.00±0.00	k__Fungi; p__Ascomycota; c__Dothideomycetes; o__Pleosporales; f__Phaeosphaeriaceae; g__Phaeosphaeria; s__Phaeosphaeria_oryzae	Phaeosphaeria	13	Saprotroph	Undefined Saprotroph	NULL	NULL	Probable	NULL	Tedersoo L, et al. 2014. Science 346:1256688
ASV219	0.00±0.00	1.50±1.50	0.00±0.00	0.00±0.00	k__Fungi; p__Ascomycota; c__Sordariomycetes; o__Hypocreales; f__Stachybotryaceae; g__Alfaria	Hypocreales	7	Saprotroph	Undefined Saprotroph	Microfungus	NULL	Possible	NULL	Sterkenburg E, et al. 2015. New Phytologist 207:1145-1158
ASV222	1.50±1.50	0.00±0.00	0.00±0.00	0.00±0.00	k__Fungi; p__Ascomycota; c__Dothideomycetes; o__Pleosporales; f__Phaeosphaeriaceae; g__Phaeosphaeria; s__Phaeosphaeria_oryzae	Phaeosphaeria	13	Saprotroph	Undefined Saprotroph	NULL	NULL	Probable	NULL	Tedersoo L, et al. 2014. Science 346:1256688
ASV223	0.00±0.00	0.00±0.00	1.50±1.50	0.00±0.00	k__Fungi; p__Ascomycota; c__Sordariomycetes; o__Hypocreales; f__Nectriaceae	Hypocreales	7	Saprotroph	Undefined Saprotroph	Microfungus	NULL	Possible	NULL	Sterkenburg E, et al. 2015. New Phytologist 207:1145-1158
ASV226	0.00±0.00	0.00±0.00	0.00±0.00	2.00±2.00	k__Fungi; p__Ascomycota; c__Dothideomycetes; o__Dothideales; f__Dothideaceae; g__Dothidea	Dothidea	13	Pathotroph-Saprotroph-Symbiotroph	Endophyte-Plant Pathogen-Undefined Saprotroph	Microfungus	NULL	Probable	NULL	Tedersoo L, et al. 2014. Science 346:1256688
ASV228	0.00±0.00	0.00±0.00	0.00±0.00	2.00±2.00	k__Fungi; p__Ascomycota; c__Lecanoromycetes; o__Caliciales; f__Physciaceae; g__Physciella; s__Physciella_chloantha	Physciella	13	Symbiotroph	Lichenized	Thallus	NULL	Highly Probable	NULL	Esslinger TL. 2014. North Dakota State University (http://www.ndsu.edu/pubweb/~esslinge/chcklst/chcklst7.htm)
ASV230	0.00±0.00	1.50±1.50	0.00±0.00	0.00±0.00	k__Fungi; p__Ascomycota; c__Sordariomycetes; o__Hypocreales; f__Nectriaceae; g__Fusarium; s__Fusarium_lacertarum	Fusarium	13	Pathotroph-Saprotroph	Plant Pathogen-Soil Saprotroph-Wood Saprotroph	NULL	Soft Rot	Probable	NULL	Duncan CG, Eslyn WE. 1966. Mycologia 58:642-664; Seehann G, et al. 1975. List of Fungi in Soft-Rot Tissue Tests. Institute fur Holzbiologie und Holzschutz, Bundesforschungsanstalt fur Forst - und Holzwirtshaft, Hamburg - Lohbrugge, Germany; Tedersoo L, et al. 2014. Science 346:1256688; Schroers et al. 2016. Mycologia 108:806-819.
ASV234	0.00±0.00	1.50±1.50	0.00±0.00	0.00±0.00	k__Fungi; p__Ascomycota; c__Sordariomycetes; o__Glomerellales; f__Glomerellaceae; g__Colletotrichum; s__Colletotrichum_gloeosporioides	Colletotrichum	13	Pathotroph-Symbiotroph	Endophyte-Plant Pathogen	Microfungus	NULL	Probable	NULL	Costa IPMW, et al. 2012. Mycotaxon 119:26; Tedersoo L, et al. 2014. Science 346:1256688; http://www.apsnet.org/publications/commonnames/Pages/default.aspx
ASV235	0.00±0.00	0.00±0.00	0.00±0.00	2.00±2.00	k__Fungi; p__Ascomycota; c__Dothideomycetes; o__Pleosporales; f__Dictyosporiaceae; g__Dictyosporium; s__Dictyosporium_heptasporum	Dictyosporium	13	Saprotroph	Undefined Saprotroph	NULL	NULL	Probable	NULL	Tedersoo L, et al. 2014. Science 346:1256688
ASV238	0.00±0.00	0.00±0.00	0.00±0.00	2.00±2.00	k__Fungi; p__Ascomycota; c__Dothideomycetes; o__Pleosporales; f__Phaeosphaeriaceae; g__Sclerostagonospora; s__Sclerostagonospora_rosae	Sclerostagonospora	13	Saprotroph	Undefined Saprotroph	NULL	NULL	Probable	NULL	Tedersoo L, et al. 2014. Science 346:1256688
ASV240	1.50±1.50	0.00±0.00	0.00±0.00	0.00±0.00	k__Fungi; p__Ascomycota; c__Sordariomycetes; o__Xylariales; f__Diatrypaceae; g__Peroneutypa; s__Peroneutypa_scoparia	Peroneutypa	13	Pathotroph	Plant Pathogen	NULL	NULL	Probable	NULL	Tedersoo L, et al. 2014. Science 346:1256688
ASV241	1.50±1.50	0.00±0.00	0.00±0.00	0.00±0.00	k__Fungi; p__Ascomycota; c__Saccharomycetes; o__Saccharomycetales; f__Saccharomycetaceae; g__Issatchenkia; s__Issatchenkia_orientalis	Saccharomycetales	7	Saprotroph	Undefined Saprotroph	Yeast	NULL	Possible	NULL	Sterkenburg E, et al. 2015. New Phytologist 207:1145-1158
ASV242	1.50±1.50	0.00±0.00	0.00±0.00	0.00±0.00	k__Fungi; p__Ascomycota; c__Dothideomycetes; o__Pleosporales; f__Phaeosphaeriaceae; g__Neosetophoma; s__Neosetophoma_rosigena	Neosetophoma	13	Saprotroph	Undefined Saprotroph	NULL	NULL	Probable	NULL	Tedersoo L, et al. 2014. Science 346:1256688
ASV225	0.00±0.00	0.00±0.00	0.00±0.00	1.66±1.66	k__Fungi; p__Basidiomycota; c__Pucciniomycetes; o__Septobasidiales; f__Septobasidiaceae; g__Septobasidium; s__Septobasidium_carestianum	Septobasidium	13	Pathotroph	Animal Pathogen	Facultative Yeast	NULL	Probable	NULL	Tedersoo L, et al. 2014. Science 346:1256688
ASV227	1.00±1.00	0.00±0.00	0.00±0.00	0.33±0.33	k__Fungi; p__Ascomycota; c__Sordariomycetes; o__Hypocreales; f__Nectriaceae	Hypocreales	7	Saprotroph	Undefined Saprotroph	Microfungus	NULL	Possible	NULL	Sterkenburg E, et al. 2015. New Phytologist 207:1145-1158
ASV231	0.00±0.00	0.75±0.75	0.50±0.50	0.00±0.00	k__Fungi; p__Ascomycota; c__Eurotiomycetes; o__Onygenales; f__Onygenales_fam_Incertae_sedis; g__Zeloasperisporium; s__Zeloasperisporium_eucalyptorum	Zeloasperisporium	13	Pathotroph	Plant Pathogen	NULL	NULL	Probable	NULL	Tedersoo L, et al. 2014. Science 346:1256688
ASV236	1.25±1.25	0.00±0.00	0.00±0.00	0.00±0.00	k__Fungi; p__Ascomycota; c__Dothideomycetes; o__Acrospermales; f__Acrospermales_fam_Incertae_sedis; g__Leptodiscella; s__	Leptodiscella	13	Saprotroph	Undefined Saprotroph	NULL	NULL	Probable	NULL	Tedersoo L, et al. 2014. Science 346:1256688
ASV239	0.00±0.00	0.00±0.00	1.25±1.25	0.00±0.00	k__Fungi; p__Ascomycota; c__Dothideomycetes; o__Dothideales; f__Aureobasidiaceae; g__Aureobasidium; s__Aureobasidium_pullulans	Aureobasidium	13	Pathotroph-Saprotroph-Symbiotroph	Animal Pathogen-Endophyte-Epiphyte-Plant Pathogen-Undefined Saprotroph	Facultative Yeast	NULL	Possible	NULL	Costa IPMW, et al. 2012. Mycotaxon 119:26; Tedersoo L, et al. 2014. Science 346:1256688; Wachowska U, Glowacka K. 2014. Biocontrol 59:pp 635-645; Irinyia L, Lacknerb M, de Hoog GS, Meyer W. 2016. Fungal Biology 120:125-136; http://www.apsnet.org/publications/commonnames/Pages/default.aspx
ASV243	1.25±1.25	0.00±0.00	0.00±0.00	0.00±0.00	k__Fungi; p__Ascomycota; c__Sordariomycetes; o__Diaporthales; f__Diaporthaceae; g__Diaporthe	Diaporthe	13	Pathotroph-Symbiotroph	Endophyte-Plant Pathogen	Microfungus	NULL	Probable	NULL	Tedersoo L, et al. 2014. Science 346:1256688
ASV248	0.00±0.00	0.00±0.00	0.00±0.00	1.66±1.66	k__Fungi; p__Ascomycota; c__Sordariomycetes; o__Xylariales; f__Apiosporaceae; g__Arthrinium; s__Arthrinium_serenense	Apiosporaceae	9	Saprotroph	Plant Saprotroph	NULL	NULL	Probable	Saprobic on dead plant parts, especially of palms, grasses etc., also isolated from soil (Cannon & Kirk 2007)	Cannon PF, Kirk PM. 2007. Fungal Families of the World. CAB International, Cambridge
ASV251	0.00±0.00	0.00±0.00	0.00±0.00	1.66±1.66	k__Fungi; p__Ascomycota; c__Eurotiomycetes; o__Chaetothyriales; f__Chaetothyriales_fam_Incertae_sedis; g__Strelitziana; s__Strelitziana_africana	Strelitziana	13	Pathotroph	Plant Pathogen	NULL	NULL	Probable	NULL	Tedersoo L, et al. 2014. Science 346:1256688
ASV253	0.00±0.00	1.25±1.25	0.00±0.00	0.00±0.00	k__Fungi; p__Ascomycota; c__Sordariomycetes; o__Diaporthales; f__Diaporthaceae; g__Diaporthe	Diaporthe	13	Pathotroph-Symbiotroph	Endophyte-Plant Pathogen	Microfungus	NULL	Probable	NULL	Tedersoo L, et al. 2014. Science 346:1256688
ASV255	0.00±0.00	1.25±1.25	0.00±0.00	0.00±0.00	k__Fungi; p__Ascomycota; c__Eurotiomycetes; o__Eurotiales; f__Aspergillaceae; g__Penicillium; s__Penicillium_oxalicum	Eurotiales	7	Saprotroph	Undefined Saprotroph	Microfungus	NULL	Possible	NULL	Sterkenburg E, et al. 2015. New Phytologist 207:1145-1158
ASV256	0.00±0.00	1.25±1.25	0.00±0.00	0.00±0.00	k__Fungi; p__Ascomycota; c__Sordariomycetes; o__Xylariales; f__Diatrypaceae; g__Peroneutypa; s__Peroneutypa_scoparia	Peroneutypa	13	Pathotroph	Plant Pathogen	NULL	NULL	Probable	NULL	Tedersoo L, et al. 2014. Science 346:1256688
ASV257	0.00±0.00	1.25±1.25	0.00±0.00	0.00±0.00	k__Fungi; p__Ascomycota; c__Sordariomycetes; o__Diaporthales; f__Diaporthaceae; g__Diaporthe	Diaporthe	13	Pathotroph-Symbiotroph	Endophyte-Plant Pathogen	Microfungus	NULL	Probable	NULL	Tedersoo L, et al. 2014. Science 346:1256688
ASV259	0.00±0.00	0.00±0.00	0.00±0.00	1.66±1.66	k__Fungi; p__Ascomycota; c__Sordariomycetes; o__Diaporthales; f__Diaporthaceae; g__Diaporthe	Diaporthe	13	Pathotroph-Symbiotroph	Endophyte-Plant Pathogen	Microfungus	NULL	Probable	NULL	Tedersoo L, et al. 2014. Science 346:1256688
ASV265	1.25±1.25	0.00±0.00	0.00±0.00	0.00±0.00	k__Fungi; p__Basidiomycota; c__Tremellomycetes; o__Filobasidiales; f__Filobasidiaceae; g__Filobasidium; s__Filobasidium_oeirense	Filobasidium	13	Saprotroph	Undefined Saprotroph	Facultative Yeast	NULL	Highly Probable	NULL	Kurtzman CP, et al. (eds.) 2011. The Yeasts, a Taxonomic Study. Fifth Edition. Vols 1-3. Elsevier, San Diego
ASV273	1.25±1.25	0.00±0.00	0.00±0.00	0.00±0.00	k__Fungi; p__Ascomycota; c__Dothideomycetes; o__Botryosphaeriales; f__Botryosphaeriaceae; g__Botryosphaeria	Botryosphaeria	13	Pathotroph	Plant Pathogen	Microfungus	NULL	Probable	NULL	Tedersoo L, et al. 2014. Science 346:1256688
ASV281	0.00±0.00	0.00±0.00	0.00±0.00	1.66±1.66	k__Fungi; p__Ascomycota; c__Eurotiomycetes; o__Eurotiales; f__Aspergillaceae; g__Penicillium; s__Penicillium_oxalicum	Eurotiales	7	Saprotroph	Undefined Saprotroph	Microfungus	NULL	Possible	NULL	Sterkenburg E, et al. 2015. New Phytologist 207:1145-1158
ASV289	1.25±1.25	0.00±0.00	0.00±0.00	0.00±0.00	k__Fungi; p__Ascomycota; c__Dothideomycetes; o__Dothideales; f__Aureobasidiaceae; g__Aureobasidium; s__Aureobasidium_thailandense	Aureobasidium	13	Pathotroph-Saprotroph-Symbiotroph	Animal Pathogen-Endophyte-Epiphyte-Plant Pathogen-Undefined Saprotroph	Facultative Yeast	NULL	Possible	NULL	Costa IPMW, et al. 2012. Mycotaxon 119:26; Tedersoo L, et al. 2014. Science 346:1256688; Wachowska U, Glowacka K. 2014. Biocontrol 59:pp 635-645; Irinyia L, Lacknerb M, de Hoog GS, Meyer W. 2016. Fungal Biology 120:125-136; http://www.apsnet.org/publications/commonnames/Pages/default.aspx
ASV261	1.00±1.00	0.00±0.00	0.00±0.00	0.00±0.00	k__Fungi; p__Ascomycota; c__Dothideomycetes; o__Pleosporales; f__Phaeosphaeriaceae; g__Ophiosphaerella; s__Ophiosphaerella_agrostidis	Ophiosphaerella	13	Saprotroph	Undefined Saprotroph	NULL	NULL	Probable	NULL	Tedersoo L, et al. 2014. Science 346:1256688
ASV264	1.00±1.00	0.00±0.00	0.00±0.00	0.00±0.00	k__Fungi; p__Basidiomycota; c__Agaricomycetes; o__Agaricales; f__Schizophyllaceae; g__Schizophyllum; s__Schizophyllum_commune	Schizophyllum	13	Saprotroph	Wood Saprotroph	NULL	White Rot	Highly Probable	NULL	Ahmada SS, Miles PG. 1970. Genetical Research 15:19-28
ASV268	1.00±1.00	0.00±0.00	0.00±0.00	0.00±0.00	k__Fungi; p__Basidiomycota; c__Tremellomycetes; o__Tremellales; f__Bulleribasidiaceae; g__Hannaella	Tremellales	7	Pathotroph-Saprotroph-Symbiotroph	Fungal Parasite-Undefined Saprotroph	Tremelloid-Yeast	NULL	Possible	The order contains both teleomorphic and anamorphic species, most of the latter being yeasts	Sterkenburg E, et al. 2015. New Phytologist 207:1145-1158
ASV269	1.00±1.00	0.00±0.00	0.00±0.00	0.00±0.00	k__Fungi; p__Ascomycota; c__Dothideomycetes; o__Pleosporales; f__Phaeosphaeriaceae; g__Neosetophoma; s__Neosetophoma_samararum	Neosetophoma	13	Saprotroph	Undefined Saprotroph	NULL	NULL	Probable	NULL	Tedersoo L, et al. 2014. Science 346:1256688
ASV271	1.00±1.00	0.00±0.00	0.00±0.00	0.00±0.00	k__Fungi; p__Ascomycota; c__Dothideomycetes; o__Pleosporales; f__Phaeosphaeriaceae; g__Neosetophoma; s__Neosetophoma_samararum	Neosetophoma	13	Saprotroph	Undefined Saprotroph	NULL	NULL	Probable	NULL	Tedersoo L, et al. 2014. Science 346:1256688
ASV276	0.00±0.00	0.00±0.00	1.00±1.00	0.00±0.00	k__Fungi; p__Ascomycota; c__Sordariomycetes; o__Hypocreales; f__Stachybotryaceae	Hypocreales	7	Saprotroph	Undefined Saprotroph	Microfungus	NULL	Possible	NULL	Sterkenburg E, et al. 2015. New Phytologist 207:1145-1158
ASV287	0.00±0.00	1.00±1.00	0.00±0.00	0.00±0.00	k__Fungi; p__Ascomycota; c__Eurotiomycetes; o__Onygenales; f__Onygenales_fam_Incertae_sedis; g__Zeloasperisporium; s__Zeloasperisporium_eucalyptorum	Zeloasperisporium	13	Pathotroph	Plant Pathogen	NULL	NULL	Probable	NULL	Tedersoo L, et al. 2014. Science 346:1256688
ASV262	0.75±0.47	0.00±0.00	0.00±0.00	0.00±0.00	k__Fungi; p__Basidiomycota; c__Agaricomycetes; o__Polyporales; f__Polyporaceae; g__Lopharia; s__Lopharia_cinerascens	Lopharia	13	Saprotroph	Undefined Saprotroph	NULL	White Rot	Probable	NULL	Tedersoo L, et al. 2014. Science 346:1256688
ASV275	0.00±0.00	0.00±0.00	0.00±0.00	1.00±0.57	k__Fungi; p__Ascomycota; c__Dothideomycetes; o__Pleosporales; f__Pleosporaceae; g__Bipolaris; s__Bipolaris_yamadae	Bipolaris	13	Pathotroph	Plant Pathogen	NULL	NULL	Probable	NULL	Tedersoo L, et al. 2014. Science 346:1256688

## Sheet: Sheet7
Table S7 The results of distance-based redundancy analysis (dbRDA).
Env	R2	value of P
trans-Linalool oxide (furan)	0.584944	0.0035**
Linalool	0.599169	0.0005**
cis-Linalool oxide (pyran)	0.329127	0.0835
Dihydro-β-ionone	0.679395	0.0005**
